# Supplementary material
Source: publisher figshare collection journal article supplement (https://gsapubs.figshare.com/articles/dataset/_/13530680)
Supplement: Supplementary file 1 [file 1]

## **Supplemental Material**

### **Biomineralization of the Cambrian chancelloriids**

Hao Yun, Xingliang Zhang, Glenn A. Brock, Luoyang Li, Guoxiang Li

Authors for correspondence:

Xingliang Zhang (xzhang69@nwu.edu.cn), Hao Yun (yunhao@nwu.edu.cn)

This file includes:

#### **Fossil Distribution, Preservation, and Repository**

**Table S1.** Chancelloriid species investigated to reveal the microstructure.

**Table S2.** Details of the figured specimens.

**Table S3.** Distribution of the microstructural features in different species.

**Figure S1.** Stratigraphical distribution of the studied specimens.

**Figure S2.** Preservation and surface ornaments of the chancelloriid sclerites.

**Figure S3.** Additional represents of the fibrous microstructures of the sclerites.

## FOSSIL DISTRIBUTION, PRESERVATION, AND REPOSITORY

Chancelloriid sclerites investigated in this study are collected from six rock successions that located in two continents (Tables S1 and S2; Fig. S1), including Xinji Formation (Cambrian Stages 3) in the Chaijiawa section (abbreviated to LC), southwestern margin of North China platform; Ajax Limestone (Stage 3) in the section AJX-M in Mt. Scott Range, Flinders Ranges of South Australia; Wirrapowie Limestone (lower Stage 3) and Mernmerna Formation (Stage 3) in the section MOG in the Moro Gorge, Arrowie Syncline, Flinders Ranges of South Australia; Mernmerna Formation in the section HUL, Flinders Ranges of South Australia; Mount Terrible Formation (Stage 2) in the Mt. Terrible area (MTF), Fleurieu Peninsula of South Australia; Monastery Creek Formation (Stage 4 to Wuliuan Stage) in the Georgina Basin of Queensland, Australia. Detailed geological and stratigraphical information was documented by Betts *et al.* (2017), Yun *et al.* (2016), Jacquet *et al.* (2016), and Dunster *et al.* (2007). The studied fossil taxa include *Chancelloria* cf. *eros* Walcott, 1920 (all from LC), *C. racemifundis* Bengtson in Bengtson *et al.*, 1990 (from AJX-M and HUL), *C. sp.* (from AJX-M, HUL, ROG-N and MOG), *Archiasterella hirundo* Bengtson in Bengtson *et al.*, 1990 (all from AJX-M), *Ar. pentactina* Sdzuy, 1969 (from AJX-M and LC), *Allonnia tripodophora* Doré & Reid, 1965 (from AJX-M and HUL), and *Eremactis mawsoni* Bengtson and Conway Morris in Bengtson *et al.*, 1990 (from MTF).

Specimens from North China are mostly preserved through preservational types 1 and 2, and usually possess fibrous features on the surface. Specimens from Australia are mainly preserved in types 3 and 4, composed of not only internal molds and steinkerns but also aggregations of blade-shaped phosphatic and clay minerals associated with the outer thin layer that displays as wrinkled and ornamented appearance (Fig 1 and Fig. S2A–J).

Soft-bodied specimens of *Allonnia phrixothrix* Bengtson & Hou, 2001 are from the Chengjiang biota (Yu'an Shan Formation, Cambrian Stage 3) in the Sanjiezi (SJZ) section, Kunming area, China (Zhang *et al.*, 2001).

Fossil specimens from the Xinji Formation and Chengjiang biota are stored in the Shaanxi Key Laboratory of Early Life and Environments (LELE), Northwest University, China. The prefix ELI of the collection number is short for the Early Life Institute of Northwest University. Specimens from the lower to middle Cambrian limestones of Australia are deposited in the Palaeobiological Lab of Macquarie University (prefix: MPAL), Australia.

## References Cited

- Yun, H., Zhang, X., Li, L., Zhang, M., and Liu, W., 2016, Skeletal fossils and microfacies analysis of the lowermost Cambrian in the southwestern margin of the North China Platform: *Journal of Asian Earth Sciences*, v. 129, p. 54–66.
- Betts, M.J., Paterson, J.R., Jago, J.B., Jacquet, S.M., Skovsted, C.B., Topper, T.P., and Brock, G.A., 2017, Global correlation of the early Cambrian of South Australia: Shelly fauna of the *Dalmanella odyseae* Zone: *Gondwana Research*, v. 46, p. 240–279.
- Jacquet, S.M., Brougham, T., Skovsted, C.B., Jago, J.B., Laurie, J.R., Betts, M.J., Topper, T.P., and Brock, G.A., 2016, *Watsonella crosbyi* from the lower Cambrian (Terreneuvian, Stage 2) Normanville Group in South Australia: *Geological Magazine*, p. 1–17.
- Dunster, J.N., Kruse, P.D., Duffett, M.L., and Ambrose, G.J., 2007, Geology and resource potential of the southern Georgina Basin: Northern Territory Geological Survey, Digital Information Package 007.
- Zhang, X., Shu, D., Li, Y., and Han, J., 2001, New sites of Chengjiang fossils: crucial windows on the Cambrian explosion: *Journal of the Geological Society*, v. 158, no. 2, p. 211–218.

**Table S1.** Chancelloriid species investigated to reveal the microstructure. Information of the soft-bodied specimens is highlighted by grey shading.

| Stage of Cambrian              | Section | Formation            | Location                                 | Species                                                                                                                                 |
|--------------------------------|---------|----------------------|------------------------------------------|-----------------------------------------------------------------------------------------------------------------------------------------|
| middle Stage 2                 | MTF     | Mt. Terrible         | Fleurieu Peninsula, Australia            | <i>Eremactis mawsoni</i>                                                                                                                |
| lower Stage 3                  | MOG     | Wirrapowie Limestone | Flinders Ranges, Australia               | <i>Chancelloria</i> sp.                                                                                                                 |
| lower to middle Stage 3        | AJX-M   | Ajax Limestone       | Flinders Ranges, Australia               | <i>Chancelloria racemifundis</i> , <i>C. sp.</i> , <i>Archiasterella hirundo</i> , <i>Ar. pentactina</i> , <i>Allonnia tripodophora</i> |
| middle Stage 3                 | HUL     | Mernmerna            | Flinders Ranges, Australia               | <i>Chancelloria racemifundis</i> , <i>C. sp.</i> , <i>Al. tripodophora</i> , ? <i>E. sp.</i>                                            |
| middle Stage 3                 | SJZ     | Yu'anshan            | Kunming, Yunnan Province China           | <i>Allonnia phrixothrix</i>                                                                                                             |
| uppermost Stage 3              | LC      | Xinji                | Longxian County, Shaanxi Province, China | <i>Chancelloria</i> cf. <i>eros</i> , <i>C. sp.</i> , <i>Ar. pentactina</i> , <i>Al. tripodophora</i>                                   |
| upper Stage 4 to Wuliuan Stage | ROG-N   | Monastery Creek      | Georgina Basin, Queensland, Australia    | <i>Chancelloria</i> sp.                                                                                                                 |

**Table S2.** Details of the figured specimens.

| <b>Figure number<br/>specimen first<br/>shown</b> | <b>Specimen number</b>  | <b>Species</b>                        | <b>Section</b> |
|---------------------------------------------------|-------------------------|---------------------------------------|----------------|
| figure 1A                                         | MPAL 0736               | <i>Chancelloria</i> sp.               | AJX-M          |
| figure 1B                                         | Thin Section lc05-01-02 | <i>Chancelloria</i> sp.               | LC             |
| figure 1C                                         | ELI LC06-11011          | <i>Chancelloria</i> cf. <i>eros</i>   | LC             |
| figure 1D                                         | Thin Section lc05-02-03 | <i>Chancelloria</i> sp.               | LC             |
| figure 1E                                         | MPAL 0737               | <i>Chancelloria</i> sp.               | MOG            |
| figure 1F                                         | Thin Section lc05-02-01 | <i>Chancelloria</i> sp.               | LC             |
| figure 1G                                         | MPAL 0738               | <i>Chancelloria</i> sp.               | MOG            |
| figure 1H                                         | Thin Section lc05-07-01 | <i>Chancelloria</i> sp.               | LC             |
| figure 2A                                         | MPAL 0739               | <i>Chancelloria racemifundis</i>      | HUL            |
| figure 2D                                         | MPAL 0740               | <i>Chancelloria racemifundis</i>      | HUL            |
| figure 2F                                         | MPAL 0742               | <i>Chancelloria</i> sp.               | HUL            |
| figure 2H                                         | MPAL 0751               | <i>Archiasterella hirundo</i>         | HUL            |
| figure 2J                                         | MPAL 0743               | <i>Chancelloria</i> sp.               | MOG            |
| figure 2K                                         | MPAL 0744               | <i>Archiasterella hirundo</i>         | AJX-M          |
| figure 2M                                         | MPAL 0741               | <i>Archiasterella hirundo</i>         | AJX-M          |
| figure 2Q                                         | MPAL 0748               | <i>Chancelloria</i> sp.               | HUL            |
| figure 2U                                         | MPAL 0755               | <i>Allonnia tripodophora</i>          | AJX-M          |
| figure 3A                                         | ELI LC06-01026          | <i>Chancelloria</i> cf. <i>eros</i>   | LC             |
| figure 3D                                         | ELI LC06-04003          | <i>Chancelloria</i> cf. <i>eros</i>   | LC             |
| figure 3F                                         | ELI LC03-01059          | <i>Chancelloria</i> cf. <i>eros</i>   | LC             |
| figure 3H                                         | ELI LC06-04011          | <i>Chancelloria</i> cf. <i>eros</i>   | LC             |
| figure 3J                                         | MPAL 0745               | <i>Chancelloria</i> sp.               | ROG-N          |
| figure 3L                                         | ELI LC06-20079          | <i>Chancelloria</i> cf. <i>eros</i>   | LC             |
| figure 3N                                         | ELI LC06-27025          | ? <i>Chancelloria</i> cf. <i>eros</i> | LC             |
| figure S2A                                        | ELI LC06-07019          | <i>Allonnia tripodophora</i>          | LC             |
| figure S2C                                        | MPAL 0746               | <i>Chancelloria racemifundis</i>      | HUL            |
| figure S2E                                        | MPAL 0747               | <i>Chancelloria</i> sp.               | ROG-N          |
| figure S2G                                        | MPAL 0749               | <i>Allonnia tripodophora</i>          | HUL            |
| figure S2I                                        | MPAL 0750               | <i>Chancelloria</i> sp.               | HUL            |

|            |                  |                                     |       |
|------------|------------------|-------------------------------------|-------|
| figure S2K | MPAL 0752        | <i>Chancelloria</i> sp.             | HUL   |
| figure S2M | MPAL 0753        | <i>Chancelloria</i> sp.             | HUL   |
| figure S2O | MPAL 0754        | <i>Archiasterella pentactina</i>    | AJX-M |
| figure S3A | MPAL 0756        | <i>Eremactis mawsoni</i>            | MTF   |
| figure S3C | ELI LC03-05076   | <i>Chancelloria</i> sp.             | LC    |
| figure S3E | ELI LC06-23003   | <i>Chancelloria</i> cf. <i>eros</i> | LC    |
| figure S3H | MPAL 0757        | <i>Chancelloria</i> sp.             | ROG-N |
| figure 4A  | ELI SJZ-B03-179A | <i>Allonnia phrixothrix</i>         | SJZ   |

**Table S3.** Distribution of the microstructural features in different species. OL, organic layer; SLF, simple lamellar fibrous structure; BLF, bundled lamellar fibrous structure. FP, foramen peripheral.

| Species                             | Microstructures |     |     |           |             |
|-------------------------------------|-----------------|-----|-----|-----------|-------------|
|                                     | OL              | SLF | BLF | Tubercles | FP granules |
| <i>Eremactis mawsoni</i>            | √               | √   |     |           | √           |
| ? <i>Eremactis</i> sp.              | √               | √   |     | √         |             |
| <i>Archiasterella pentactina</i>    | √               | √   | ?   |           |             |
| <i>Archiasterella hirundo</i>       | √               | √   | ?   | √         |             |
| <i>Allonnia tripodophora</i>        | √               | √   | √   |           | √           |
| <i>Chancelloria racemifundis</i>    | √               | √   | ?   | √         | √           |
| <i>Chancelloria</i> cf. <i>eros</i> | √               | √   | √   |           |             |
| <i>Chancelloria</i> sp.             | √               | √   | √   | √         |             |

|          |           | South China                                                     |                                                                           | North China                                                                                                  | Australia                                                                                                             |                           |
|----------|-----------|-----------------------------------------------------------------|---------------------------------------------------------------------------|--------------------------------------------------------------------------------------------------------------|-----------------------------------------------------------------------------------------------------------------------|---------------------------|
|          |           | SSF zones                                                       |                                                                           |                                                                                                              |                                                                                                                       | SSF zones                 |
| Cambrian | Wuliuan   |                                                                 |                                                                           |                                                                                                              | <i>Chancelloria</i> ; <i>Allonnia</i> ;<br><i>Archiasterella</i><br>Monastery Creek Fm                                |                           |
|          | Stage 4   | Canglangpuan                                                    |                                                                           |                                                                                                              | * <i>Chancelloria australilonga</i><br>Emu Bay Shale                                                                  |                           |
|          |           | <i>Pelagiella madianensis</i> -<br><i>Stenotheca drepanoida</i> |                                                                           | <i>Chancelloria</i> cf. <i>eros</i> ;<br><i>Allonnia tripodophora</i> ;<br><i>Archiasterella</i><br>Xinji Fm |                                                                                                                       |                           |
|          | Stage 3   | Qiongzhusian                                                    | <i>Pelagiella subangulata</i>                                             |                                                                                                              | <i>Chancelloria</i> ;<br><i>Allonnia</i> ;<br><i>Archiasterella</i> ;<br><i>Eremactis</i><br>Ajax Ls and Mernmerna Fm | <i>Daliyatia odyssei</i>  |
|          |           |                                                                 | * <i>Allonnia phrixothrix</i> ,<br><i>Al. erjiensis</i> ,<br>Yu'anshan Fm |                                                                                                              |                                                                                                                       |                           |
|          | Stage 2   | Meishucunian                                                    | <i>Sinosachites flabelliformis</i> -<br><i>Tannuolina zhangwentangi</i>   |                                                                                                              |                                                                                                                       | <i>Micrina etheridgei</i> |
|          |           |                                                                 |                                                                           |                                                                                                              |                                                                                                                       | <i>Kulparina rostrata</i> |
|          |           |                                                                 |                                                                           |                                                                                                              |                                                                                                                       |                           |
|          |           |                                                                 | <i>Watsonella crosbyi</i>                                                 |                                                                                                              | <i>Chancelloria</i> ;<br><i>Allonnia</i> ; <i>Eremactis</i><br>Mt. Terrible Fm                                        |                           |
|          | Fortunian |                                                                 | <i>Paragloborilus subglobosus</i> -<br><i>Purella squamulosa</i>          |                                                                                                              |                                                                                                                       |                           |
|          |           |                                                                 | <i>Anabarites trisulcatus</i> -<br><i>Protohertzina anabarica</i>         |                                                                                                              |                                                                                                                       |                           |

**Figure S1.** Stratigraphical distribution of the studied specimens. Modified after Betts *et al.* (2017), Yun *et al.* (2016), and Jacquet *et al.* (2016). The asterisk indicates exceptionally-preserved fossils.



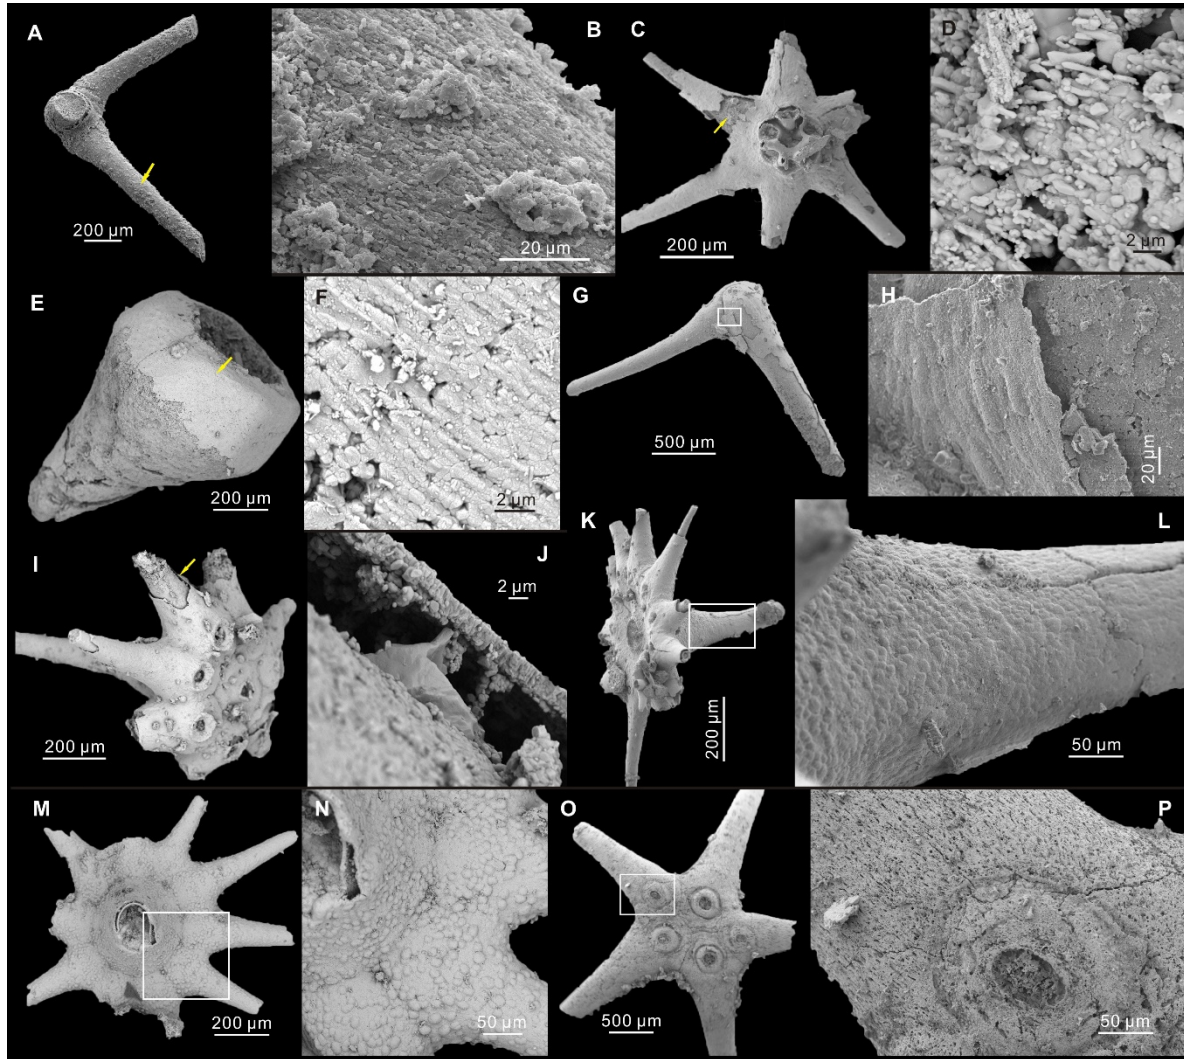

**Figure S2.** Preservation and surface ornaments of the cancelloriid sclerites. (A, B) *Allonnia tripodophora*, specimen ELI LC06-07019, a phosphatized steinkern with fibrous linings on the surface (preserved type 2); B is the close-up of the position pointed by a yellow arrow in A. (C, D) *Chancelloria racemifundis*, MPAL 0746, a phosphatized steinkern with fibrous linings plus a phosphatized replacement of the outer layer (preserved type 4); D is the close-up of the position pointed by a yellow arrow in C. (E, F) A steinkern of a central ray of *C. sp.*, MPAL 0747, showing distinct fibrous columns formed by compact amorphous and blade-shaped minerals; F is the close-up of the position pointed by a yellow arrow in E. (G, H) *Al. tripodophora*, MPAL 0749, showing the thin outer layer and wrinkles on the surface. (I, J) *Chancelloria sp.*, MPAL 0750, a thin layer wrapping the sclerites. (K–N) Dense tubercles on the sclerites of *C. sp.*; (K, L) MPAL 0752; (M, N) MPAL 0753. (O, P) *Archiasterella pentactina*, MPAL 0754, showing distinctive foremen peripheral ridges.

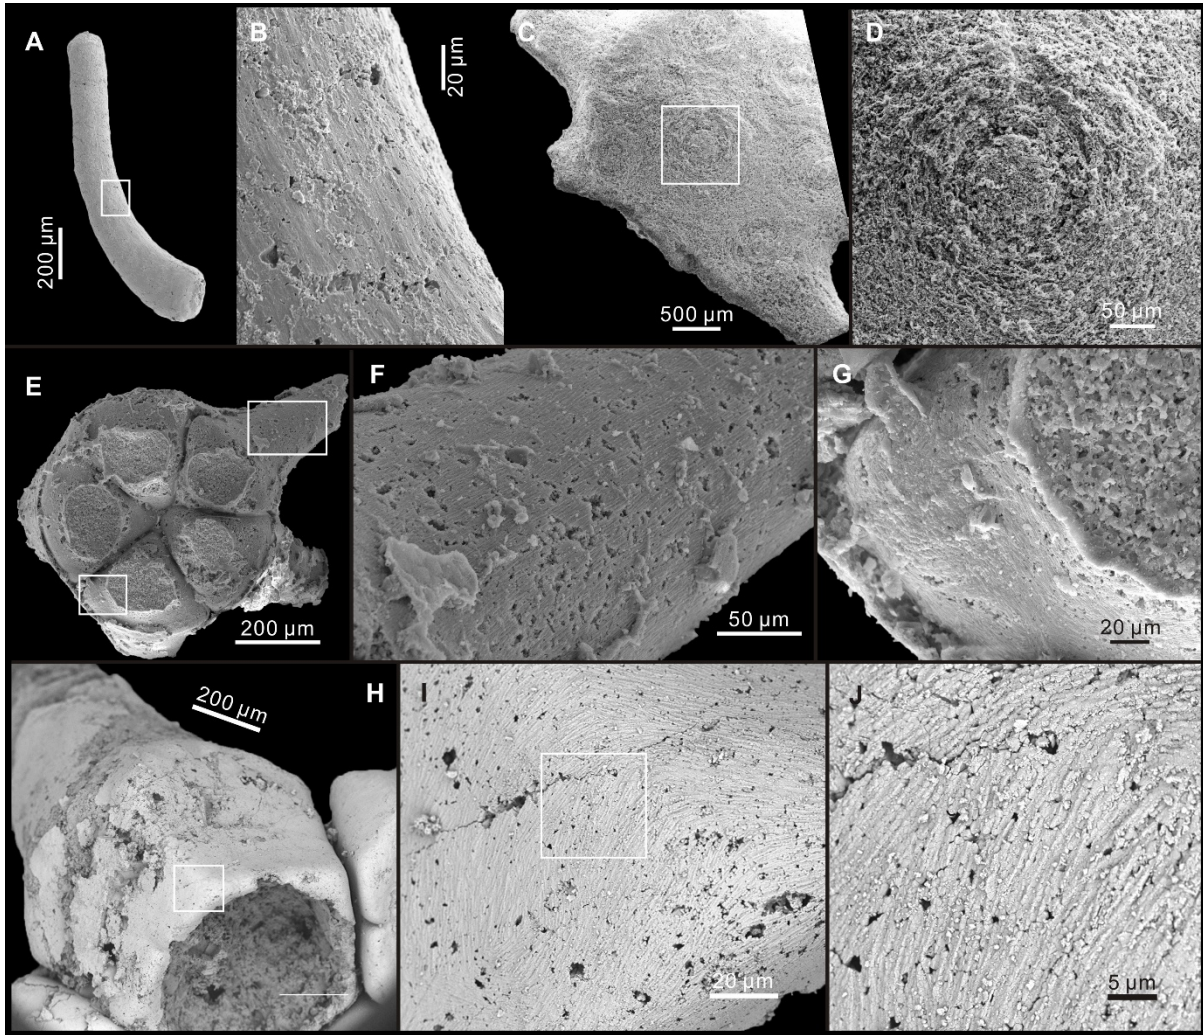

**Figure S3.** Additional represents of the fibrous microstructures of the sclerites. (A, B) *Eremactis mawsoni*, MPAL 0756, showing homogenous fibrous columns with their long axes parallel to the long axis of the ray. (C, D) *Chancelloria* sp., ELI LC03-05076, showing homogenous fibrous columns with their long axes along the tangential direction around the basal foramen of the sclerites. (E–G) *C. cf. eros*, ELI LC06-23003, showing fibrous columns with their long axes parallel to the long axis of the ray in the main part (F) and along the tangential directions around the foramen in the basal areas (G). (H–J) *C. sp.*, MPAL 0757, showing interlaced fibrous bundles distributed in the curved surface of the sclerites.
